# Supplementary material for: Switching isotropic and anisotropic graphene growth in a solid source CVD system
Source: Royal Society of Chemistry journal article supplement (doi:10.1039/c8ce00886h), 2018-01-01
Supplement: c8ce00886h1.pdf [file c8ce00886h1.pdf]

**Supplementary information**

**Switching isotropic and anisotropic graphene growth in a solid source CVD**

Balaram Paudel Jaisi,<sup>\*a</sup> Kamal P. Sharma,<sup>a</sup> Subash Sharma,<sup>a</sup> Rakesh D. Mahyavanshi,<sup>a</sup>

Golap Kalita,<sup>\*a,b</sup> Masaki Tanemura<sup>a</sup>

---

<sup>a</sup>*Department of Physical Science and Engineering, Nagoya Institute of Technology*  
<sup>b</sup>*Frontier Research Institute for Material Science, Nagoya Institute of Technology, Nagoya,*  
*Japan*

---

Gokiso-cho, Showa-ku, Nagoya 466-8555, Japan.

\*Corresponding Author: E-mail: poudel\_balaram@yahoo.com, kalita.golap@nitech.ac.jp  
(G.K.); Phone/Fax: +81-527355216

## 1. Optical microscope (OM) images of graphene domains for three different experiments.

OM analysis of the synthesized graphene on Cu foil was performed to measure the average graphene domain size as shown in the following figure S1. The OM analysis clearly shows the difference in graphene size for the three growth conditions. The average graphene domain size and growth speed of three different regions as shown in the OM images are calculated and included the following table S1.

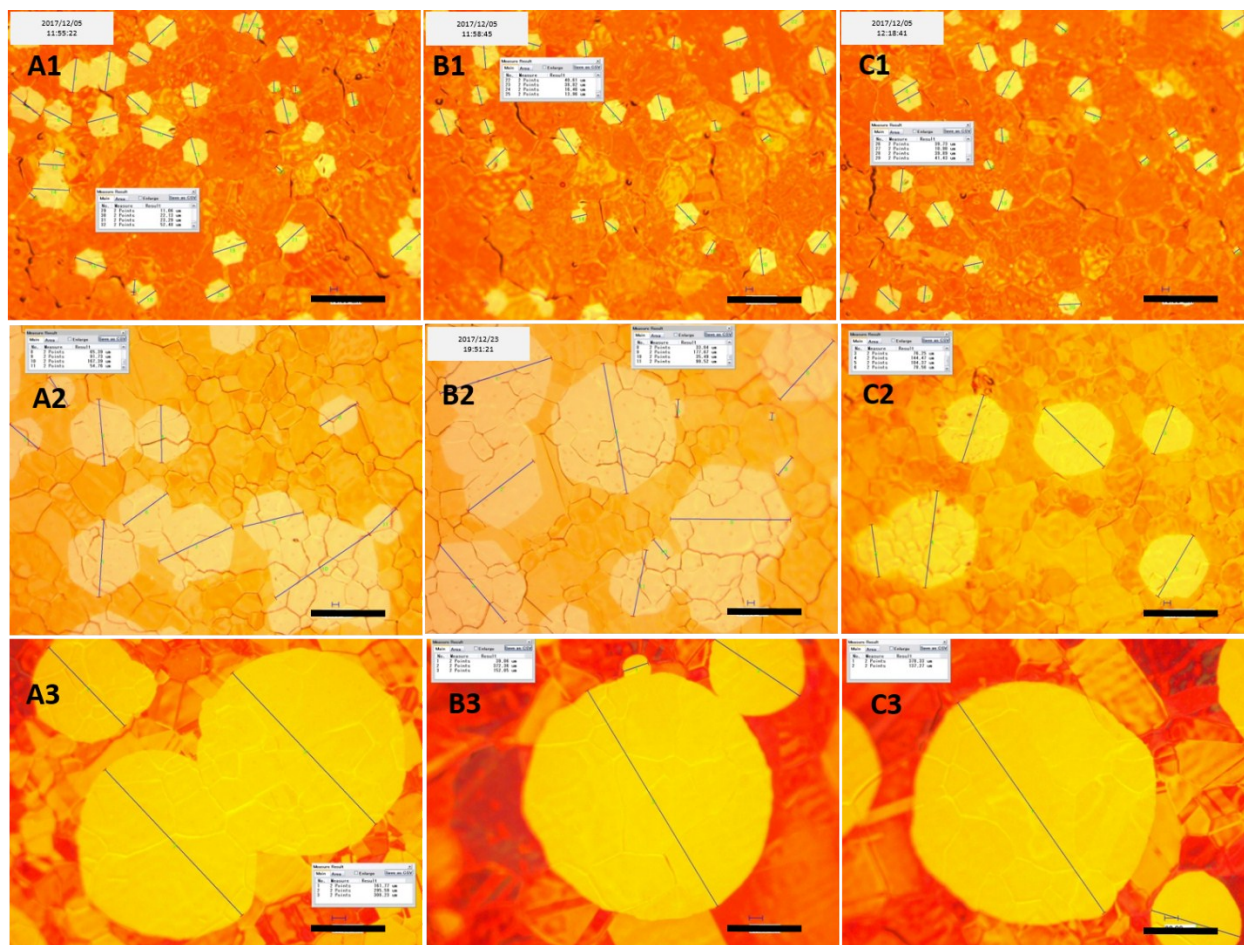

**Figure S1.** OM images of samples presenting the graphene domain sizes along their longest diagonal at three different regions of Expt 1 (A1-C1), Expt 2(A2-C2) and Expt 3. (A3-C3). Scale bars: 100  $\mu\text{m}$

**Table S1.** Calculation of average graphene domain size and growth speed of three different regions of three samples from the OM images of fig. S1.

| Sample of Expt. | Region | No. of domains measured | Average Graphene domain size ( $\mu\text{m}$ ) | Grand average ( $\mu\text{m}$ ) | Average growth speed ( $\mu\text{m}/\text{min}$ ) |
|-----------------|--------|-------------------------|------------------------------------------------|---------------------------------|---------------------------------------------------|
| 1               | A1     | 32                      | 36.9059                                        | 33.7342                         | 0.2765                                            |
|                 | B1     | 25                      | 32.8636                                        |                                 |                                                   |
|                 | C1     | 29                      | 30.9848                                        |                                 |                                                   |
| 2               | A2     | 11                      | 89.4536                                        | 98.4779                         | 0.8072                                            |
|                 | B2     | 11                      | 103.7255                                       |                                 |                                                   |
|                 | C2     | 6                       | 105.4017                                       |                                 |                                                   |
| 3               | A3     | 3                       | 255.1967                                       | 230.5825                        | 1.8900                                            |
|                 | B3     | 3                       | 187.8233                                       |                                 |                                                   |
|                 | C3     | 2                       | 257.8000                                       |                                 |                                                   |

## 2. Scanning electron microscope (SEM) images of graphene domains for three different experiments.

SEM analysis of the synthesized graphene domains on Cu foil was performed to measure the average domain density as shown in the following figure S2. The SEM analysis clearly shows the difference in graphene domain density for the three growth conditions. The average domain density of the three different regions as shown in the SEM images are calculated and included the following table S2.

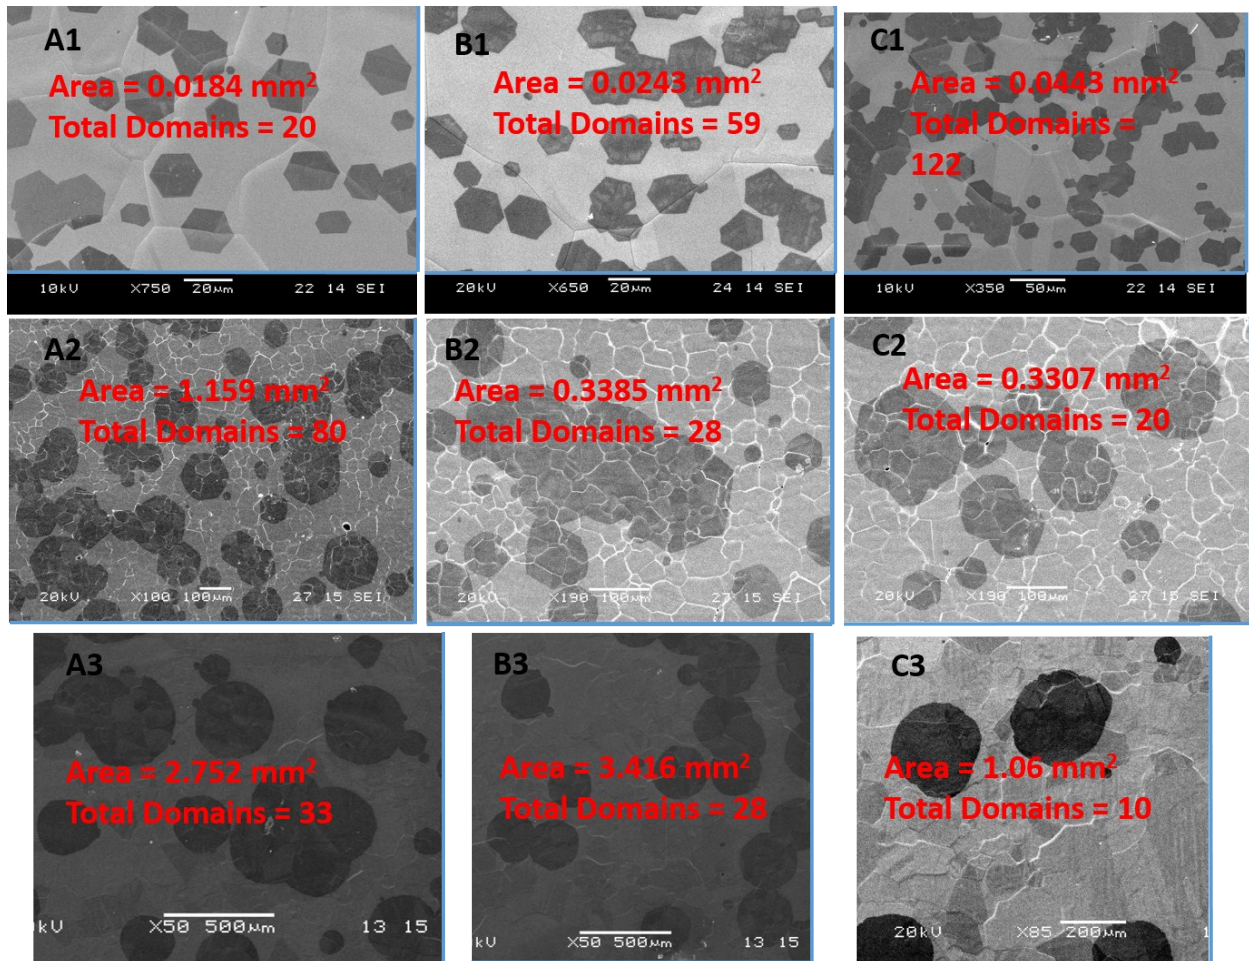

**Figure S2.** SEM images of three different regions of samples of (A1-C1) Expt 1, (A2-C2) Expt 2 and (A3-C3) Expt 3 with respective area and number of graphene domains counted.

**Table S2.** Calculation of graphene domains density at three different regions of three samples in figure S2.

| <b>Sample of Expt.</b> | <b>Region</b> | <b>Area(mm<sup>2</sup>)</b> | <b>Graphene Domains Count</b> | <b>Domains Density (mm<sup>-2</sup>)</b> | <b>Average (mm<sup>-2</sup>)</b> |
|------------------------|---------------|-----------------------------|-------------------------------|------------------------------------------|----------------------------------|
| <b>1</b>               | <b>A1</b>     | <b>0.0184</b>               | <b>20</b>                     | <b>1086.9565</b>                         | <b>2089.6300</b>                 |
|                        | <b>B1</b>     | <b>0.0243</b>               | <b>59</b>                     | <b>2427.9835</b>                         |                                  |
|                        | <b>C1</b>     | <b>0.0443</b>               | <b>122</b>                    | <b>2753.9503</b>                         |                                  |
| <b>2</b>               | <b>A2</b>     | <b>1.1590</b>               | <b>80</b>                     | <b>69.0250</b>                           | <b>70.7402</b>                   |
|                        | <b>B2</b>     | <b>0.3385</b>               | <b>28</b>                     | <b>82.7179</b>                           |                                  |
|                        | <b>C2</b>     | <b>0.3307</b>               | <b>20</b>                     | <b>60.4778</b>                           |                                  |
| <b>3</b>               | <b>A3</b>     | <b>2.7520</b>               | <b>33</b>                     | <b>11.9913</b>                           | <b>9.8740</b>                    |
|                        | <b>B3</b>     | <b>3.4160</b>               | <b>28</b>                     | <b>8.1967</b>                            |                                  |
|                        | <b>C3</b>     | <b>1.0600</b>               | <b>10</b>                     | <b>9.4340</b>                            |                                  |

### 3. Cu domain size by optical microscope (OM) analysis

The OM analysis of the annealed Cu foil without synthesizing the graphene shows the distribution of Cu grain. A variation of Cu grain with the three growth conditions can be observed from the annealed sample as shown the following figure S3. In table S3 the calculated of average Cu-grain sizes at three different regions of three samples are summarized.

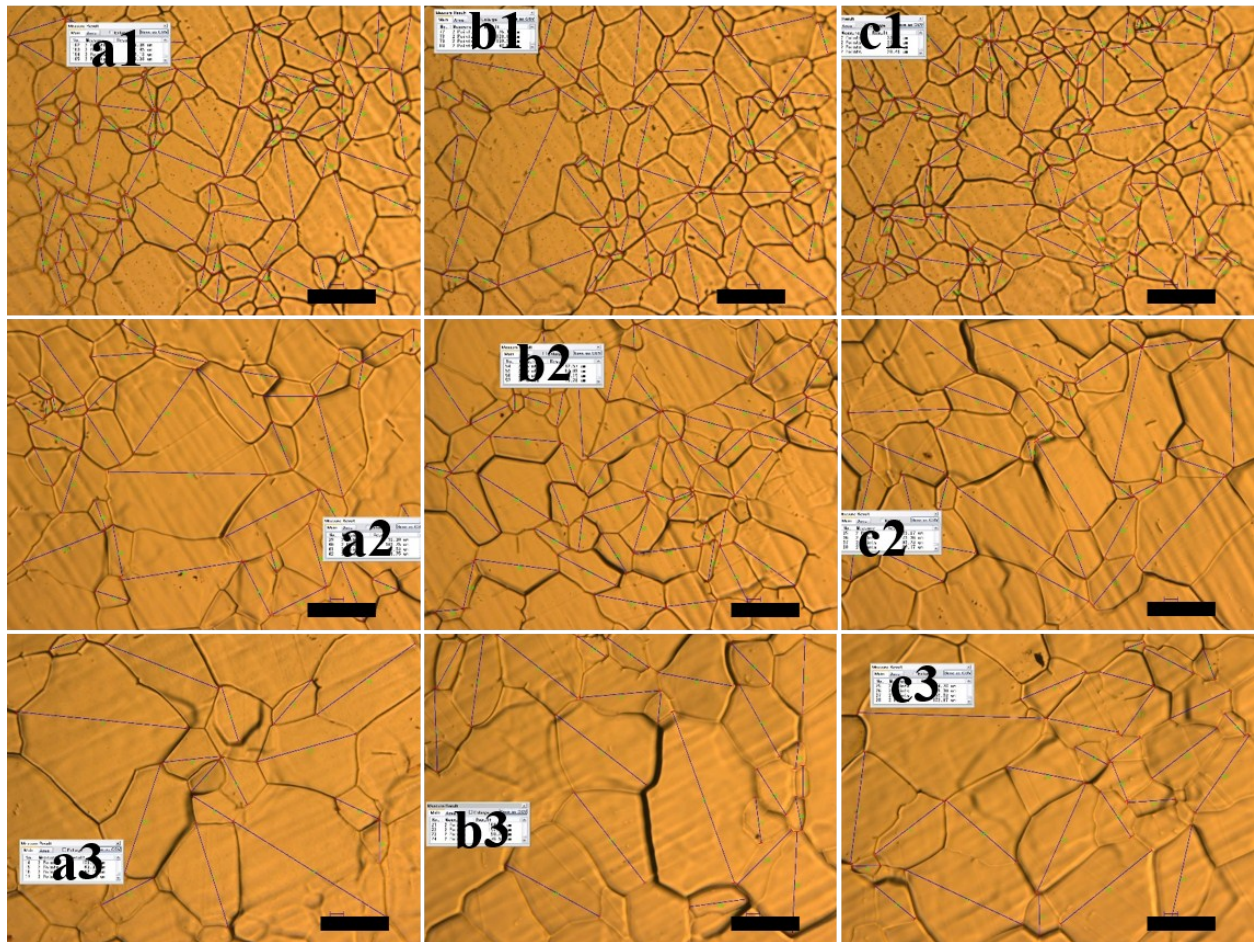

**Figure S3.** OM images of annealed samples to determine Cu grains size at three different regions of (a1-c1) Expt 1, (a2-c2) Expt 2 and (a3-c3) Expt 3. (Scale bars: 100  $\mu\text{m}$ ).

**Table S3.** Calculation of Average Cu-grains sizes at three different regions of three samples in fig. S3.

| <b>Sample of Expt.</b> | <b>Region</b> | <b>No. of Grains</b> | <b>Average Cu-grain size (<math>\mu\text{m}</math>)</b> | <b>Grand Average (<math>\mu\text{m}</math>)</b> |
|------------------------|---------------|----------------------|---------------------------------------------------------|-------------------------------------------------|
| <b>1</b>               | <b>a1</b>     | <b>123</b>           | <b>50.3309</b>                                          | <b>54.8547</b>                                  |
|                        | <b>b1</b>     | <b>80</b>            | <b>63.0086</b>                                          |                                                 |
|                        | <b>c1</b>     | <b>105</b>           | <b>53.9414</b>                                          |                                                 |
| <b>2</b>               | <b>a2</b>     | <b>42</b>            | <b>79.3105</b>                                          | <b>79.8343</b>                                  |
|                        | <b>b2</b>     | <b>57</b>            | <b>74.0811</b>                                          |                                                 |
|                        | <b>c2</b>     | <b>38</b>            | <b>89.0429</b>                                          |                                                 |
| <b>3</b>               | <b>a3</b>     | <b>17</b>            | <b>122.6188</b>                                         | <b>110.5355</b>                                 |
|                        | <b>b3</b>     | <b>24</b>            | <b>108.2763</b>                                         |                                                 |
|                        | <b>c3</b>     | <b>28</b>            | <b>105.1357</b>                                         |                                                 |

#### 4. Electron back scattered diffraction (EBSD) analysis

The EBSD analysis was performed to observe the crystallographic nature of the annealed Cu foil for the three different growth conditions. The EBSD result can be correlated with the previous results of variation in Cu grain with change in volumetric amount of gas flow in the three growth conditions.

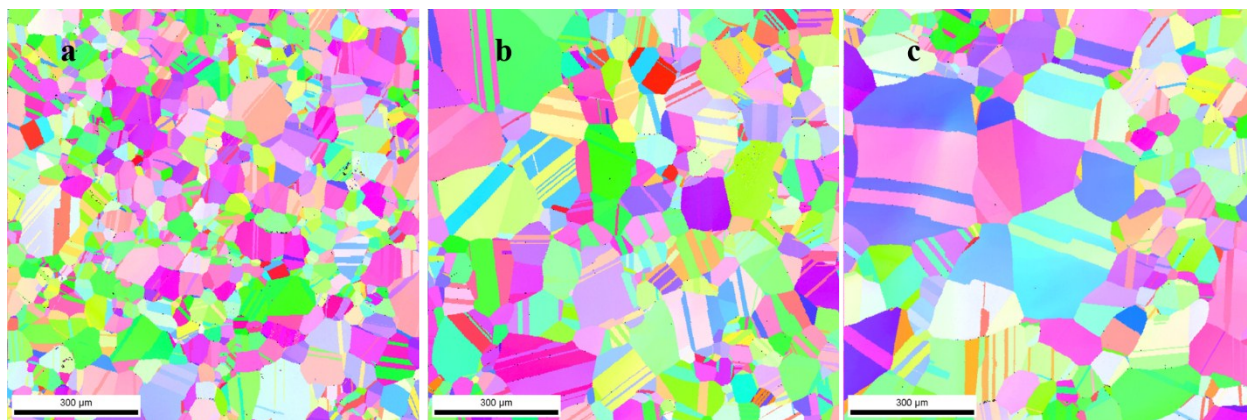

**Figure S4.** EBSD images of annealed samples revealing the comparative Cu grains size of (a) Expt 1, (b) Expt 2 and (c) Expt 3.

#### 5. Raman point spectra analysis for the three different graphene domains

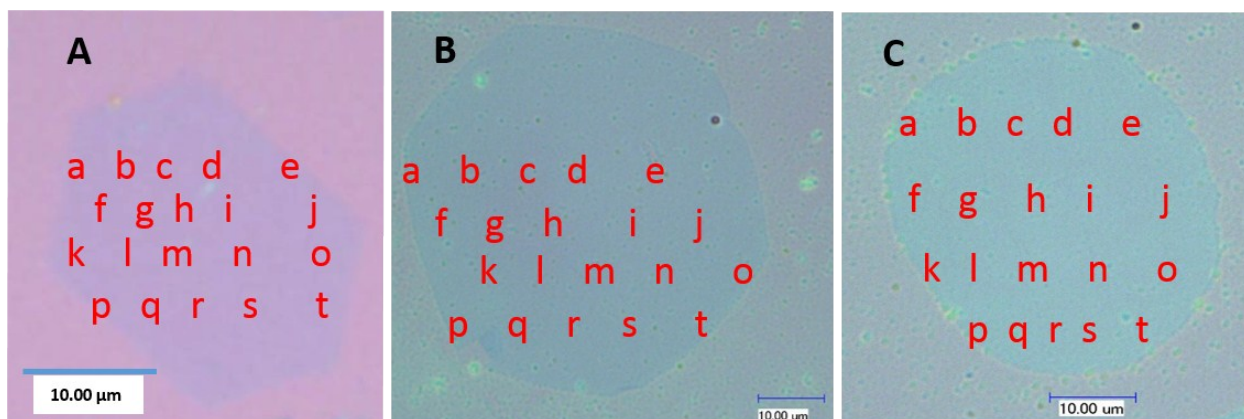

**Figure S5.** OM images of transferred graphene domains on  $\text{SiO}_2/\text{Si}$  of (A) Expt 1, (B) Expt 2 and (C) Expt 3 with 20 points at which Raman spectra are taken for D/G and 2D/G ratios.



**Table S4.** Calculation of D/G and 2D/G peak ratio of Raman spectra for the hexagonal domain as of figure S5 (A).

| <b>Position of spectra</b> | <b>D-Peak height (au)</b> | <b>G-Peak height (au)</b> | <b>2D-Peak height (au)</b> | <b>D/G peak Ratio</b> | <b>2D/G peak Ratio</b> |
|----------------------------|---------------------------|---------------------------|----------------------------|-----------------------|------------------------|
| <b>a</b>                   | <b>26.33</b>              | <b>256.54</b>             | <b>557.54</b>              | <b>0.1028</b>         | <b>2.1777</b>          |
| <b>b</b>                   | <b>9.19</b>               | <b>239.76</b>             | <b>539.65</b>              | <b>0.0384</b>         | <b>2.2507</b>          |
| <b>c</b>                   | <b>4.21</b>               | <b>262.99</b>             | <b>601.94</b>              | <b>0.0160</b>         | <b>2.2888</b>          |
| <b>d</b>                   | <b>9.03</b>               | <b>230.56</b>             | <b>547.04</b>              | <b>0.0392</b>         | <b>2.3727</b>          |
| <b>e</b>                   | <b>8.09</b>               | <b>238.62</b>             | <b>553.35</b>              | <b>0.0339</b>         | <b>2.3189</b>          |
| <b>f</b>                   | <b>12.20</b>              | <b>249.15</b>             | <b>551.87</b>              | <b>0.0490</b>         | <b>2.2150</b>          |
| <b>g</b>                   | <b>6.47</b>               | <b>254.94</b>             | <b>550.31</b>              | <b>0.0254</b>         | <b>2.1585</b>          |
| <b>h</b>                   | <b>4.84</b>               | <b>232.82</b>             | <b>529.69</b>              | <b>0.0208</b>         | <b>2.2751</b>          |
| <b>i</b>                   | <b>5.06</b>               | <b>240.47</b>             | <b>550.77</b>              | <b>0.0210</b>         | <b>2.2904</b>          |
| <b>j</b>                   | <b>5.33</b>               | <b>249.44</b>             | <b>561.06</b>              | <b>0.0214</b>         | <b>2.2493</b>          |
| <b>k</b>                   | <b>5.57</b>               | <b>245.55</b>             | <b>523.82</b>              | <b>0.0227</b>         | <b>2.1333</b>          |
| <b>l</b>                   | <b>5.29</b>               | <b>253.54</b>             | <b>530.82</b>              | <b>0.0217</b>         | <b>2.0936</b>          |
| <b>m</b>                   | <b>3.49</b>               | <b>218.07</b>             | <b>466.82</b>              | <b>0.0160</b>         | <b>2.1407</b>          |
| <b>n</b>                   | <b>4.17</b>               | <b>231.05</b>             | <b>523.15</b>              | <b>0.0181</b>         | <b>2.2642</b>          |
| <b>o</b>                   | <b>5.12</b>               | <b>247.51</b>             | <b>514.39</b>              | <b>0.0207</b>         | <b>2.0783</b>          |
| <b>p</b>                   | <b>6.35</b>               | <b>243.71</b>             | <b>545.16</b>              | <b>0.0261</b>         | <b>2.2369</b>          |
| <b>q</b>                   | <b>20.06</b>              | <b>243.57</b>             | <b>552.93</b>              | <b>0.0824</b>         | <b>2.2701</b>          |
| <b>r</b>                   | <b>5.60</b>               | <b>243.88</b>             | <b>526.84</b>              | <b>0.0230</b>         | <b>2.1602</b>          |
| <b>s</b>                   | <b>4.11</b>               | <b>244.37</b>             | <b>542.06</b>              | <b>0.0168</b>         | <b>2.2182</b>          |
| <b>t</b>                   | <b>5.03</b>               | <b>252.75</b>             | <b>507.85</b>              | <b>0.0199</b>         | <b>2.0093</b>          |
| <b>Average</b>             |                           |                           |                            | <b>0.0317</b>         | <b>2.2101</b>          |

**Table S5.** Calculation of D/G and 2D/G peak ratio of Raman spectra for the imperfect hexagonal domain as of fig S5 (B).

| <b>Position of spectra</b> | <b>D-Peak height (au)</b> | <b>G-Peak height (au)</b> | <b>2D-Peak height (au)</b> | <b>D/G peak Ratio</b> | <b>2D/G peak Ratio</b> |
|----------------------------|---------------------------|---------------------------|----------------------------|-----------------------|------------------------|
| <b>a</b>                   | <b>8.19</b>               | <b>141.45</b>             | <b>459.02</b>              | <b>0.0579</b>         | <b>3.2451</b>          |
| <b>b</b>                   | <b>8.97</b>               | <b>153.55</b>             | <b>461.19</b>              | <b>0.0584</b>         | <b>3.0035</b>          |
| <b>c</b>                   | <b>7.00</b>               | <b>153.55</b>             | <b>463.42</b>              | <b>0.0457</b>         | <b>3.0345</b>          |
| <b>d</b>                   | <b>19.27</b>              | <b>149.62</b>             | <b>436.30</b>              | <b>0.1288</b>         | <b>2.9161</b>          |
| <b>e</b>                   | <b>5.47</b>               | <b>163.94</b>             | <b>421.71</b>              | <b>0.0333</b>         | <b>2.5724</b>          |
| <b>f</b>                   | <b>10.71</b>              | <b>202.89</b>             | <b>404.43</b>              | <b>0.0528</b>         | <b>1.9933</b>          |
| <b>g</b>                   | <b>8.72</b>               | <b>168.73</b>             | <b>412.28</b>              | <b>0.0517</b>         | <b>2.4434</b>          |
| <b>h</b>                   | <b>8.56</b>               | <b>169.29</b>             | <b>394.39</b>              | <b>0.0506</b>         | <b>2.3297</b>          |
| <b>i</b>                   | <b>14.96</b>              | <b>170.31</b>             | <b>408.85</b>              | <b>0.0879</b>         | <b>2.4007</b>          |
| <b>j</b>                   | <b>6.32</b>               | <b>166.41</b>             | <b>391.19</b>              | <b>0.0380</b>         | <b>2.3508</b>          |
| <b>k</b>                   | <b>6.71</b>               | <b>167.37</b>             | <b>390.72</b>              | <b>0.0401</b>         | <b>2.3345</b>          |
| <b>l</b>                   | <b>7.25</b>               | <b>169.94</b>             | <b>397.81</b>              | <b>0.0427</b>         | <b>2.3409</b>          |
| <b>m</b>                   | <b>11.44</b>              | <b>148.24</b>             | <b>386.90</b>              | <b>0.0772</b>         | <b>2.6100</b>          |
| <b>n</b>                   | <b>6.75</b>               | <b>167.41</b>             | <b>395.53</b>              | <b>0.0404</b>         | <b>2.3627</b>          |
| <b>o</b>                   | <b>8.82</b>               | <b>173.90</b>             | <b>405.49</b>              | <b>0.0507</b>         | <b>2.3317</b>          |
| <b>p</b>                   | <b>5.70</b>               | <b>172.46</b>             | <b>386.84</b>              | <b>0.0331</b>         | <b>2.2431</b>          |
| <b>q</b>                   | <b>11.66</b>              | <b>151.94</b>             | <b>488.04</b>              | <b>0.0767</b>         | <b>2.9488</b>          |
| <b>r</b>                   | <b>7.42</b>               | <b>157.77</b>             | <b>405.91</b>              | <b>0.0470</b>         | <b>2.5728</b>          |
| <b>s</b>                   | <b>7.34</b>               | <b>157.05</b>             | <b>416.56</b>              | <b>0.0468</b>         | <b>2.6525</b>          |
| <b>t</b>                   | <b>6.61</b>               | <b>171.10</b>             | <b>393.08</b>              | <b>0.0386</b>         | <b>2.2974</b>          |
| <b>Average</b>             |                           |                           |                            | <b>0.0549</b>         | <b>2.5492</b>          |

**Table S6.** Calculation of D/G and 2D/G peak ratio of Raman spectra for the circular graphene domain as of figure S5 (C).

| <b>Position of spectra</b> | <b>D-Peak height (au)</b> | <b>G-Peak height (au)</b> | <b>2D-Peak height (au)</b> | <b>D/G peak Ratio</b> | <b>2D/G peak Ratio</b> |
|----------------------------|---------------------------|---------------------------|----------------------------|-----------------------|------------------------|
| <b>a</b>                   | <b>123.00</b>             | <b>2037.03</b>            | <b>6620.49</b>             | <b>0.0600</b>         | <b>3.0200</b>          |
| <b>b</b>                   | <b>84.02</b>              | <b>2090.32</b>            | <b>6596.06</b>             | <b>0.0400</b>         | <b>3.1500</b>          |
| <b>c</b>                   | <b>85.06</b>              | <b>2068.95</b>            | <b>6911.76</b>             | <b>0.0400</b>         | <b>3.3400</b>          |
| <b>d</b>                   | <b>237.22</b>             | <b>2071.31</b>            | <b>6719.31</b>             | <b>0.1100</b>         | <b>3.0240</b>          |
| <b>e</b>                   | <b>86.11</b>              | <b>2107.95</b>            | <b>6664.94</b>             | <b>0.0400</b>         | <b>3.1600</b>          |
| <b>f</b>                   | <b>73.22</b>              | <b>1967.85</b>            | <b>6661.55</b>             | <b>0.0370</b>         | <b>3.3800</b>          |
| <b>g</b>                   | <b>70.35</b>              | <b>2137.13</b>            | <b>6097.07</b>             | <b>0.0330</b>         | <b>2.8500</b>          |
| <b>h</b>                   | <b>130.19</b>             | <b>2106.54</b>            | <b>6321.04</b>             | <b>0.0610</b>         | <b>3.0007</b>          |
| <b>i</b>                   | <b>76.97</b>              | <b>2177.30</b>            | <b>6904.94</b>             | <b>0.0350</b>         | <b>3.1710</b>          |
| <b>j</b>                   | <b>170.23</b>             | <b>2152.20</b>            | <b>6718.25</b>             | <b>0.0790</b>         | <b>3.1200</b>          |
| <b>k</b>                   | <b>207.79</b>             | <b>2107.92</b>            | <b>6565.71</b>             | <b>0.0980</b>         | <b>3.1140</b>          |
| <b>l</b>                   | <b>89.38</b>              | <b>2058.46</b>            | <b>6368.83</b>             | <b>0.0430</b>         | <b>3.0930</b>          |
| <b>m</b>                   | <b>51.75</b>              | <b>2170.98</b>            | <b>6048.15</b>             | <b>0.0240</b>         | <b>2.7850</b>          |
| <b>n</b>                   | <b>122.17</b>             | <b>2109.86</b>            | <b>6433.83</b>             | <b>0.0580</b>         | <b>3.0490</b>          |
| <b>o</b>                   | <b>138.19</b>             | <b>2165.16</b>            | <b>6602.20</b>             | <b>0.0640</b>         | <b>3.0490</b>          |
| <b>p</b>                   | <b>141.16</b>             | <b>2056.31</b>            | <b>6455.67</b>             | <b>0.0680</b>         | <b>3.3190</b>          |
| <b>q</b>                   | <b>47.84</b>              | <b>2267.83</b>            | <b>6468.70</b>             | <b>0.0210</b>         | <b>2.8520</b>          |
| <b>r</b>                   | <b>140.46</b>             | <b>2126.67</b>            | <b>6519.18</b>             | <b>0.0660</b>         | <b>3.0650</b>          |
| <b>s</b>                   | <b>97.03</b>              | <b>2123.48</b>            | <b>6751.75</b>             | <b>0.0457</b>         | <b>3.1760</b>          |
| <b>t</b>                   | <b>98.59</b>              | <b>2181.38</b>            | <b>6915.42</b>             | <b>0.0450</b>         | <b>3.1700</b>          |
| <b>Average</b>             |                           |                           |                            | <b>0.0534</b>         | <b>3.0944</b>          |
